# Supplementary material
Source: PubMed Central journal article supplement (PMC5685895)

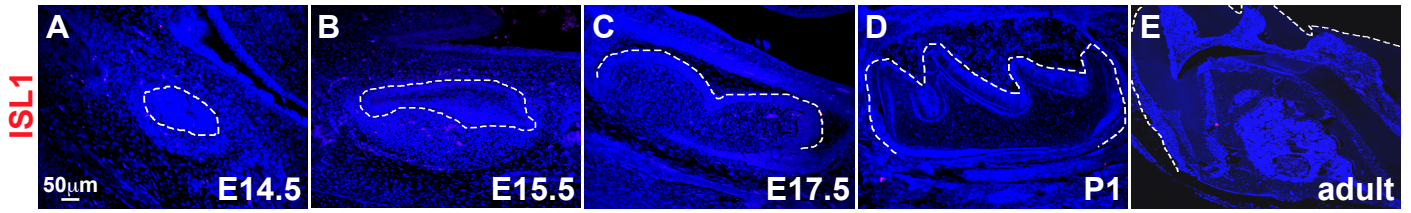

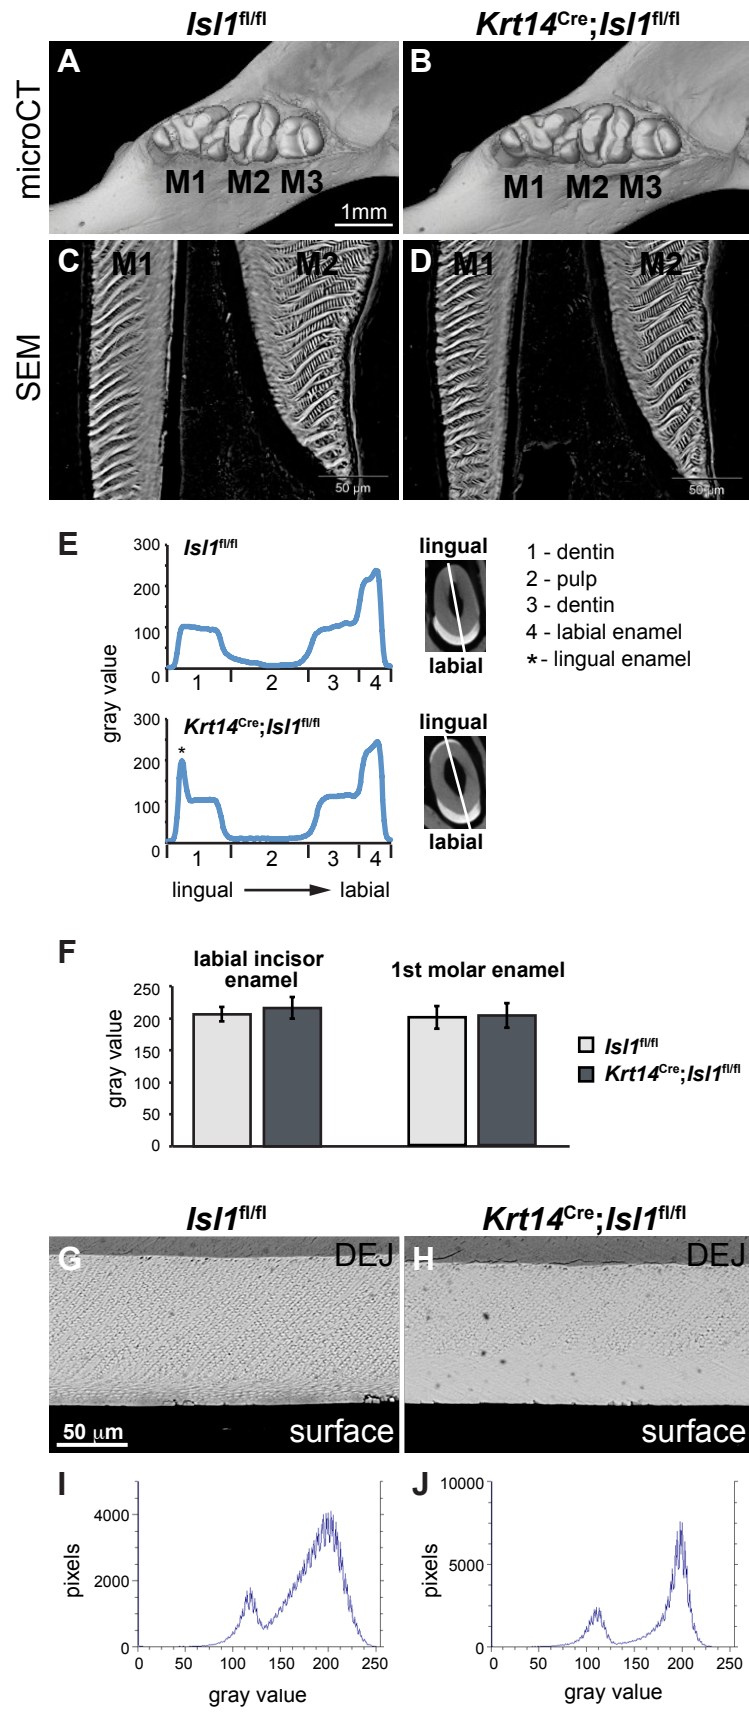



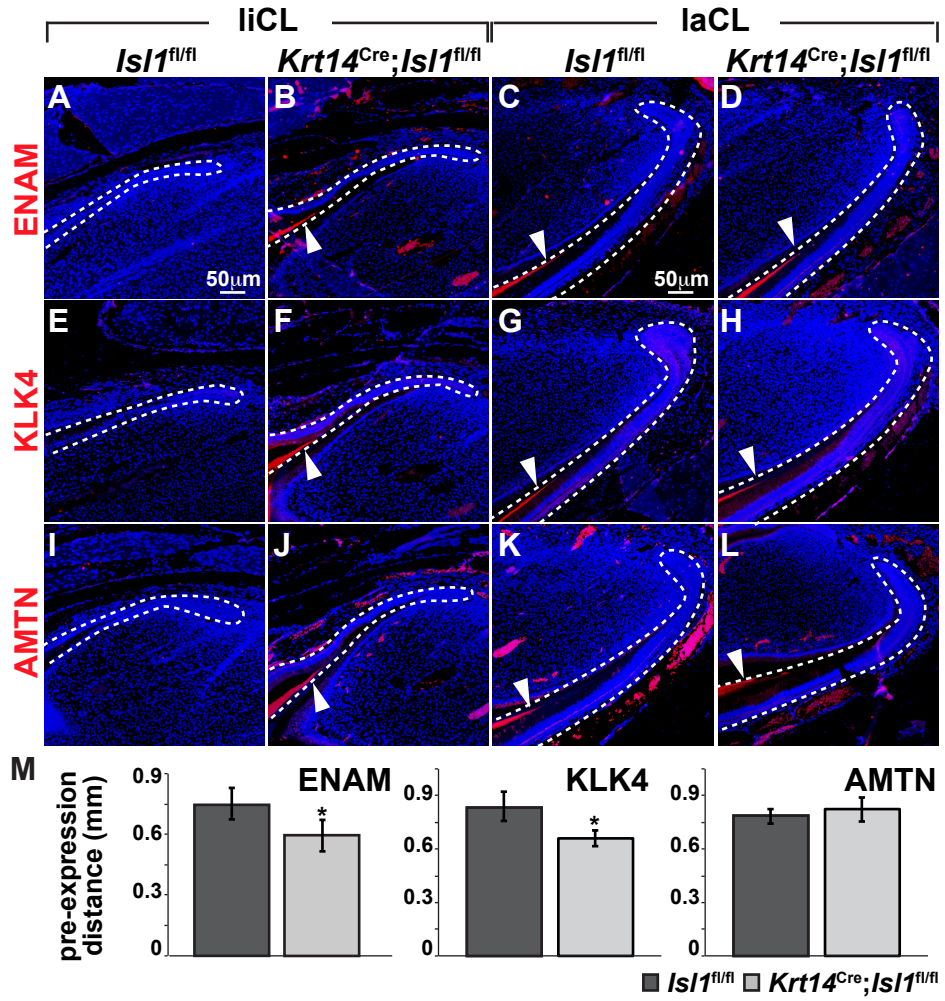

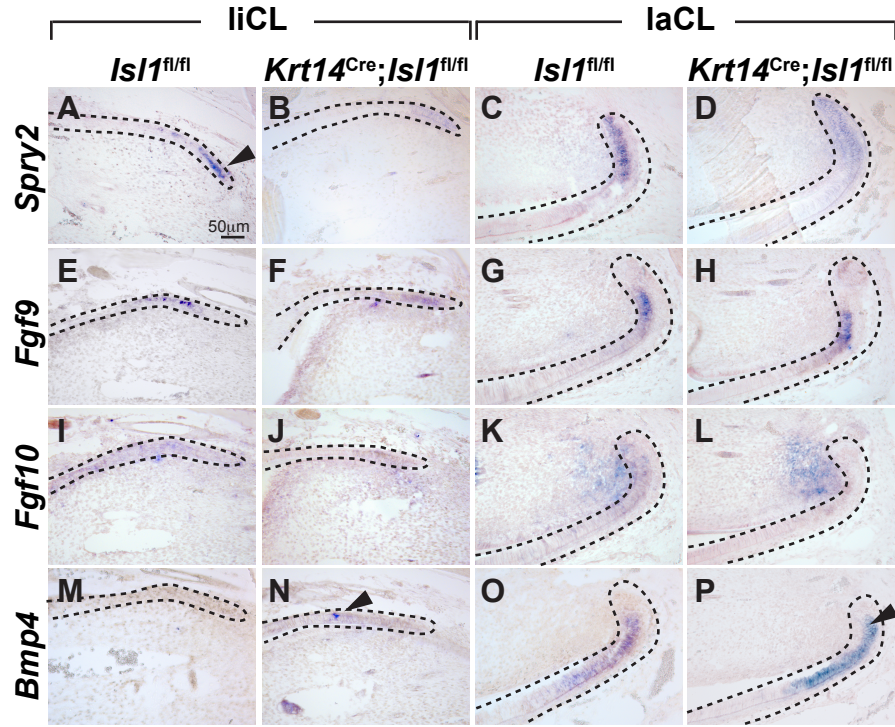

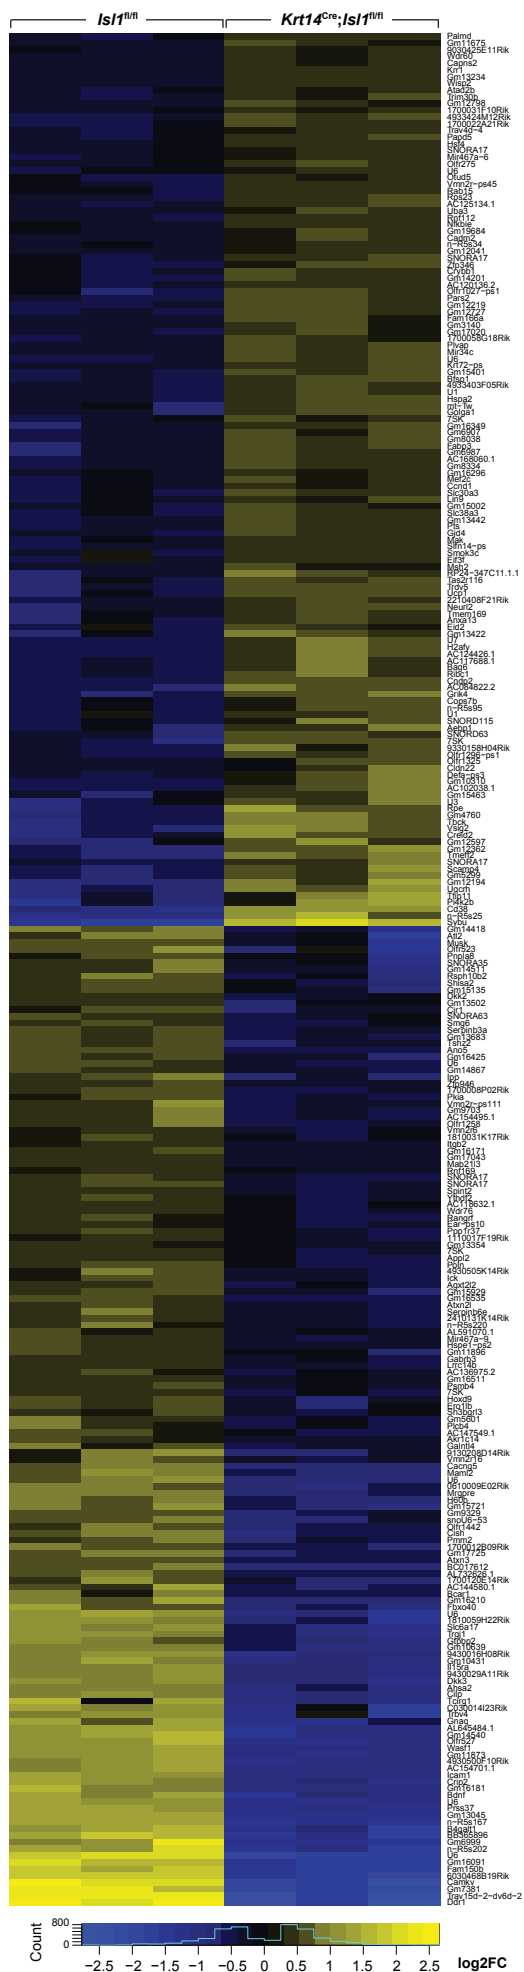

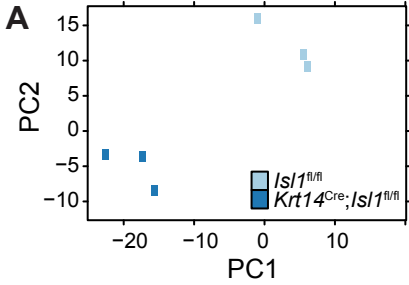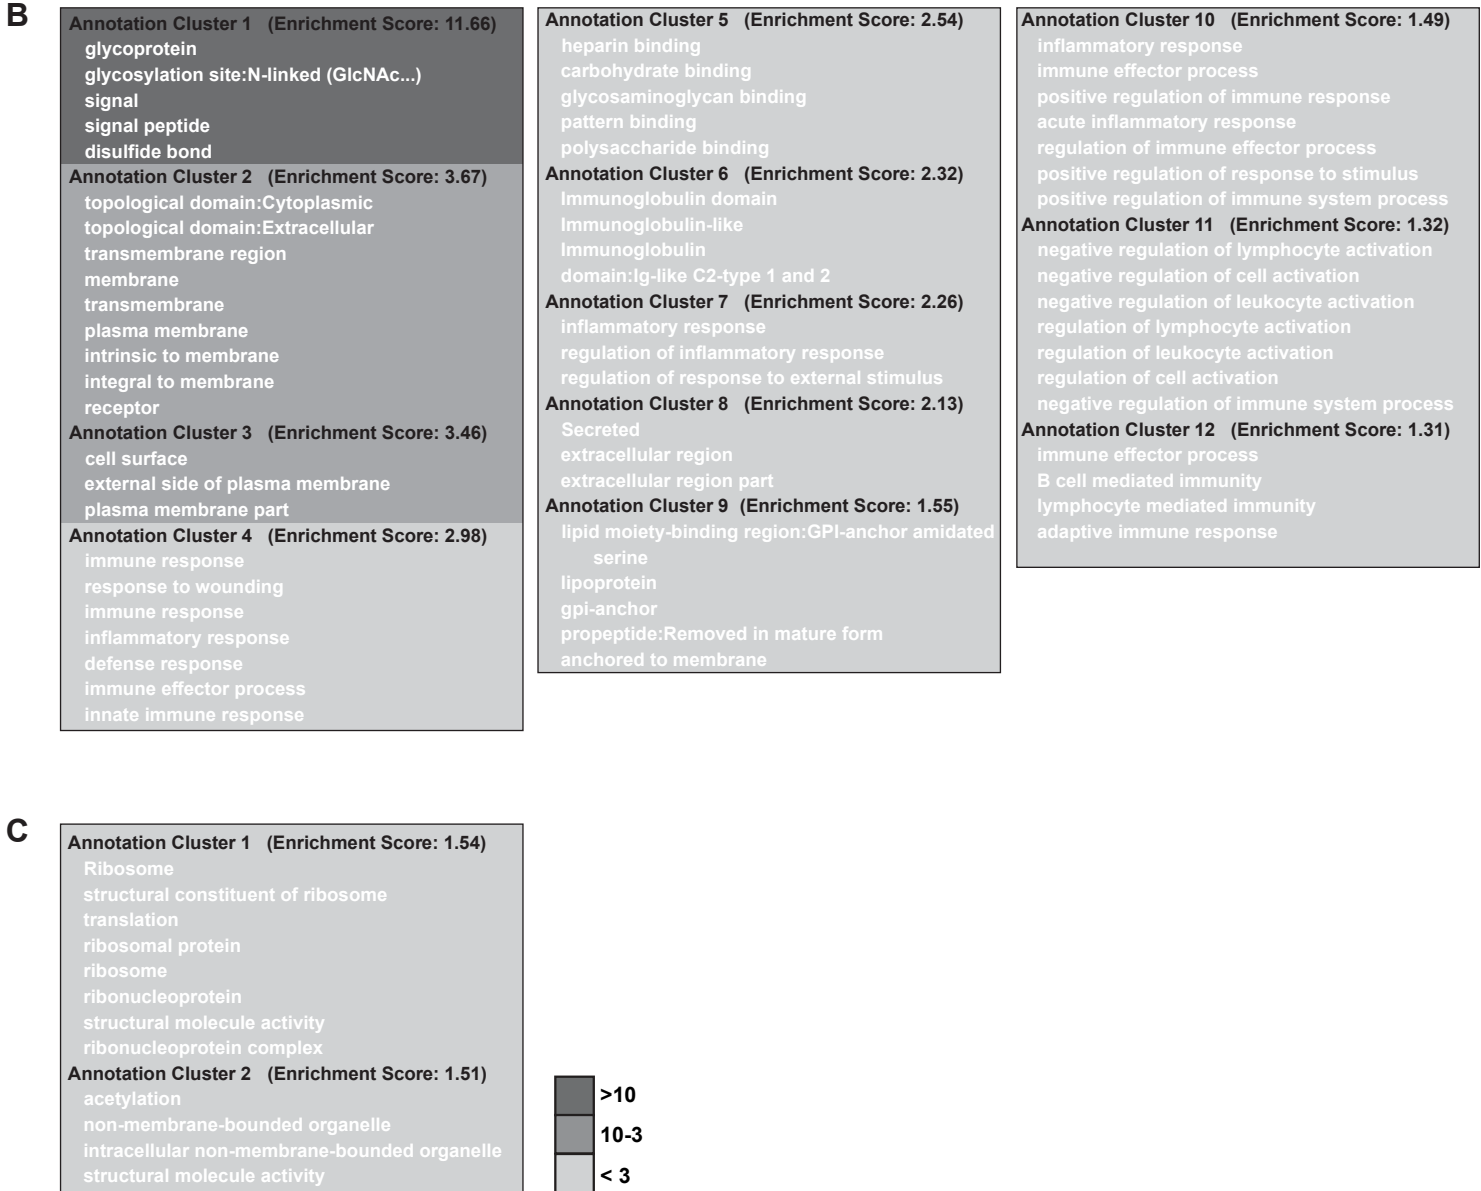

Supplement: NIHMS896422-supplement-Supp_figures.pdf [file NIHMS896422-supplement-Supp_figures.pdf]
